1 ***Translation and cross-cultural adaptation to Portuguese of The Patient-***  
2 ***And Nutrition-Derived Outcome Risk Assessment Score (PANDORA)***

3

4

5 Juliana B. de Lima<sup>1¶</sup>, Marina B. Campos <sup>1¶</sup>, Lays S. Ribeiro <sup>1¶</sup>, Maria I. S. Taboada<sup>1\*</sup>

6

7

8

9 <sup>1</sup> Hospital das Clínicas de Goiás. Primeira Avenida s/nº, Setor Leste Universitário,  
10 Goiânia – Goiás – Brazil.

11

12

13

14 \*Corresponding author:

15 E-mail: [julianablina.nutri@gmail.com](mailto:julianablina.nutri@gmail.com) (JBL)

16

17

18

19 The authors contributed equally to this work.

## 21 **Abstract**

22

23 **Introduction:** Hospital malnutrition presents alarming rates and is characterized as an  
24 independent risk factor for mortality. Hospital mortality has been studied as an important  
25 indicator of the quality of care. In this sense, the Patient- And Nutrition-Derived Outcome  
26 Risk Assessment Score (PANDORA) was created, seeking to associate the nutritional  
27 status and in-patients' illness data with the risk of death within 30 days. The study aimed  
28 to perform the translation, cross-cultural adaptation to Portuguese and application of an  
29 instrument of identification of mortality risk in the hospital setting. **Methods:** A cross-  
30 sectional study was carried out in a university hospital in the city of Goiania-GO, Brazil,  
31 in 2018. A translation and adaptation of the PANDORA instrument was carried out and  
32 it was applied to hospitalized patients to evaluate their power to predict mortality.  
33 **Results:** Fifty-four 54 patients were included in the study, most of them female and 33%  
34 elderly. More than 16% of the sample presented low weight, which was positively  
35 associated with the occurrence of death. The prevalence of cancer was almost 80% and  
36 all patients who died had cancer. In the adjusted logistic regression analysis, it was  
37 verified that there was no association between the PANDORA score and death in  
38 hospitalized patients, however, there was a trend of association of sex and body mass  
39 index with death in these patients. **Conclusions:** In this study, the PANDORA score was  
40 not able to predict death in the patients in our sample, but found significant association  
41 of low weight at admission with mortality. Further studies are needed for the validation  
42 of PANDORA in Portuguese.

43

44 **Keywords:** Malnutrition, hospital mortality, BMI.

45

## 46 **Introduction**

47

48           Hospital malnutrition has alarming rates despite therapeutic advances, especially  
49 in emerging and industrialized countries. It affects almost 50% of adult patients in Latin  
50 American countries, including Brazil. About 40% of in-patients are affected by this  
51 condition, which represents an independent risk factor for mortality, besides favoring  
52 complications during hospitalization [1,2]. The influence of nutritional status on patient  
53 prognosis has been reported in the literature some time ago. Correia and Waitzberg (2003)  
54 found a 12.4% mortality rate in malnourished patients, three times higher than those  
55 considered well-nourished in the study (4.7%), showing that malnutrition is an  
56 independent risk factor for the increase in hospital mortality [3].

57           According to Tsaousi et al. (2014), inadequate feeding can increase up to eight  
58 times the risk of hospital mortality, in addition to prolonged hospital stay [4]. This  
59 condition is often neglected and presents a high risk of developing other complications,  
60 such as surgical and infectious, pressure lesions, increase in length of hospitalization and  
61 depletion of the immune system. Its early identification is important to establish the most  
62 appropriate nutritional management aiming at better outcomes in these patients [5].

63           Hospital mortality has been identified for many years as an important indicator of  
64 the quality of care provided and has been extensively studied through the application of  
65 predictive instruments. One of the first predictive models of death within 30 days of  
66 hospital stay was for elderly patients with acute myocardial infarction [6]. These  
67 predictive models have been extensively used in emergencies and specific acute situations  
68 such as cerebral vascular accident (CVA), acute coronary syndrome (ACS), heart failure  
69 (HF), among others, in order to evaluate the quality of care provided [7].

70 In this sense, Hiesmayr et al. (2015) developed a simple punctuation system to  
71 predict mortality in 30 days of hospitalized patients, with scores based on nutrition and  
72 baseline disease. The instrument was named *The Patient- And Nutrition-Derived*  
73 *Outcome Risk Assessment Score* (PANDORA), and seeks to associate nutritional status  
74 and in-patient disease data with the risk of death within 30 days [2].

75 From the above, evaluating the risk of hospital death related to nutritional status  
76 through a standardized questionnaire is important to assess the effectiveness of services  
77 provided in the hospital environment, and may contribute to the establishment of more  
78 effective therapeutic plans. Thus, this study aimed to perform the translation, cross-  
79 cultural adaptation to Portuguese and application of a risk identification instrument for  
80 mortality in the hospital setting.

81

## 82 **Methods**

### 83 **Study design**

84 A cross-sectional study was developed in a tertiary university hospital, through  
85 the application of the translated and adapted questionnaire.

86

### 87 **Population**

88 The study sample consisted of adult patients hospitalized with any pathologies.  
89 Patients older than 18 years, hospitalized in the Medical, Surgical, Tropical or Emergency  
90 Clinics were included in the study. Patients under 18 years of age, in intensive care and  
91 pregnant patients were excluded.

92

## 93 **Ethical aspects**

94           The study was submitted to the HC-UFG / EBSEH Research Ethics Committee,  
95 approved under No. 2,674,012. All participants were informed about the content of the  
96 study and the risks involved, by means of a signed Free and Informed Consent Form.

97

## 98 **Procedures for cross-cultural translation and adaptation**

### 99 **adopted in the study**

100           The methodology for translation and cross-cultural adaptation of the questionnaire  
101 adopted in the study was based on the procedures suggested by Beaton et al. [8], American  
102 Educational Research Association, American Psychological Association and National  
103 Council on Measurement in Education [9] and reviewed by Muñiz, Elosua and  
104 Hambleton [10], according to Fig. 1.

105

106 Fig 1. Methodological procedures used in the translation and cross-cultural adaptation of  
107 PANDORA into Portuguese

108

109           In order to perform the translation and adaptation, the authors of the original  
110 instrument gave permission (Fig. 2) for its use, via e-mail. In addition, a committee was  
111 formed by the authors of the new version of PANDORA, to discuss concepts adjacent to  
112 the adapted test, considering the particularities of the target population. All translators in  
113 the study were unaware of the test to be adapted.

114

115 Fig. 2. Original PANDORA Questionnaire

116

117           The applicability of the synthesis in Portuguese (2nd stage) was performed by  
118 means of paraphrase, in which the interviewer asks the question and asks the respondent  
119 to repeat it immediately. The synthesis in Portuguese was sent for retranslation, which  
120 was then compared with the original one to validate its Portuguese version.

121

## 122 **Data collection**

123           Data collection took place from June to December 2018 and was carried out by  
124 previously trained nutritionists, using the instrument obtained from the final synthesis of  
125 PANDORA.

126           PANDORA is composed of 7 items related to the general evaluation with  
127 questions related to age, body mass index (BMI), physical activity level, hospitalizations,  
128 in-patient group, disease, hydration, and dietary assessment (amount of food ingested on  
129 the day of collection).

130           Each item quoted above generated a final score that was used to calculate the  
131 probability of death. The outcome (death or non-death) was followed up by searching the  
132 medical files of the hospital within 30 days of hospitalization.

133

## 134 **Statistical analysis**

135           The collected data were stored in spreadsheets. A descriptive statistical analysis  
136 was performed, where the continuous data were presented in mean and average standard  
137 deviation. The normality of the data was tested by the Shapiro-Wilk test. In the presence  
138 of normality, an unpaired t-Student test was used to compare means. In the absence of  
139 normality, the U-Mann Whitney test was adopted. The relationship between the  
140 PANDORA score and hospital mortality at 30 days was assessed by the Logit formula

141 (Logit =  $-6.72 + 0.1058 \times \text{PANDORA SCORE}$ ). From this result, the probability of death  
142 was calculated ( $e^{\text{logit}} / 1 + e^{\text{logit}}$ ).

143 Data on categorical variables were presented in absolute (n) and relative (%)  
144 values. Fisher's exact test was performed to compare proportions between groups of  
145 categorical variables.

146 Logistic regression analysis (gross and adjusted) was performed using a death  
147 outcome to verify the association and the magnitude with the PANDORA score. From  
148 this analysis, the Odds ratio and its respective confidence interval were estimated.

149 Finally, a ROC curve analysis was performed to evaluate the predictive power of the score  
150 on the outcome (death versus non-death) and estimated the area under the curve and its  
151 confidence interval.

152 The level of significance used for all tests was 5%. STATA® software version  
153 12.0 was used.

154

## 155 **Results**

156 The PANDORA questionnaire has been translated and adapted into Portuguese.  
157 No operational difficulties were observed during the paraphrase and retranslation test,  
158 allowing a reliable final Portuguese version (Fig. 3).

159

160 Fig. 3. Portuguese version of the PANDORA questionnaire

161

162 The study included 54 patients with a mean age of 50.63 (sd = 16.81), of which  
163 more than half were male and 33% were elderly (> 60 years). More than 16% of the  
164 patients presented low weight, that is, BMI <18.5 kg / m<sup>2</sup> for adults or <22 kg / m<sup>2</sup> for the  
165 elderly, which was associated with death in the evaluated patients (p = 0.008). Among

166 these low-weight patients, 12.5% reported that they did not eat anything on the day of  
167 data collection, 37.5% were fasting, 37.5% were 100% food acceptance, and 12.5% ate a  
168 quarter of what was offered on the day.

169 Considering the entire study population, the following data regarding food were  
170 observed: 28.8% of the patients ate half of what was offered; 6.6% did not eat anything;  
171 12.9% were fasted; and 8.8% ate a quarter of the offer.

172 The mean PANDORA score was higher than 32 points in the general sample,  
173 however, with no significant difference in means in patients who died or not during  
174 hospitalization ( $p > 0.05$ ). The prevalence of death in the study population was 9.2%.  
175 When evaluating the probability of death among patients, the mean was greater than 5%  
176 in the total sample (Table 1).

177

178 **Table 1.** Characterization of the study population and its relation with death / hospital  
179 discharge

| <b>Variables</b>              | <b>Total</b><br>n=54 | <b>Death</b><br>n=5(9.26) | <b>No death</b><br>n=49(90.74) | <b>p-value</b> |
|-------------------------------|----------------------|---------------------------|--------------------------------|----------------|
| <b>Age</b>                    | 50.63±16.81          | 48.6±9.29                 | 50.84±17.44                    | 0.780*         |
| <b>Sex</b>                    |                      |                           |                                |                |
| Male                          | 28(51.85)            | 1(20.00)                  | 27(55.10)                      | 0.184**        |
| Female                        | 26(48.15)            | 4(80.00)                  | 22(44.90)                      |                |
| <b>BMI (kg/m<sup>2</sup>)</b> | 22.57±4.80           | 18.01±3.44                | 23.03±4.70                     | <b>0.024*</b>  |
| Low weight                    | 9(16.67)             | 4(80.00)                  | 5(10.20)                       | 0.008**        |
| Eutrophy                      | 32(59.26)            | 1(20.00)                  | 31(63.27)                      |                |
| Overweight                    | 10(20.41)            | 0                         | 10(20.41)                      |                |
| Obesity                       | 3(6.12)              | 0                         | 3(6.12)                        |                |
| <b>PANDORA score</b>          | 32.13±9.66           | 37.20±11.75               | 31.61±9.41                     | 0.221*         |



|                                         |           |           |           |         |
|-----------------------------------------|-----------|-----------|-----------|---------|
| <b>Probability of death (%)</b>         | 5.42±6.33 | 9.00±9.56 | 5.06±5.93 | 0.188‡  |
| <b>Classification of nutrition risk</b> |           |           |           | 0.144** |
| With risk                               | 33(61.11) | 5(100.00) | 28(57.14) |         |
| No risk                                 | 21(38.86) | 0         | 21(42.86) |         |

180 Values presented in absolute values (relative values) or means ± standard deviation of the mean. p-value  
181 obtained by unpaired Student t-test or Fisher's exact test or Mann-Whitney test with 5% level of  
182 significance.  
183

184

185 In the PANDORA questionnaire, only cancer disease is scored, with the other  
186 diseases classified as zero. It was verified that 83.3% (n = 45) of the studied population  
187 were diagnosed with some type of cancer, the most prevalent disease (79.62%), followed  
188 by Chronic Renal Disease, with a prevalence of 5.5%. Among the cancer patients, 17.7%  
189 had low weight, 100% presented nutritional risk. Of the ones who died, 100% were cancer  
190 patients.

191 In the adjusted logistic regression analysis, it was verified that there was no  
192 association between the PANDORA score and death in hospitalized patients; however,  
193 there was a trend of association of sex and BMI with death in these patients (Table 2). It  
194 was not possible to perform the analyzes with the probability of estimated death from  
195 PANDORA, due to the small sample size.

196 When verifying the predictive power of the PANDORA score on death in  
197 hospitalized patients using the ROC curve (Fig. 4), it was possible to verify an area under  
198 the curve of 0.66 considered adequate; however, when evaluating its range of confidence,  
199 we found that its lower limit was below 0.5, making the PANDORA score inadequate to  
200 predict death in patients in our sample.

201

202 Fig 4. ROC curve

203 **Table 2.** Association among PANDORA score, demographic variables and nutritional status of the study population

|                               | <b>Gross</b>     |         | <b>Model 1</b>  |         | <b>Model 2</b>   |         | <b>Model 3</b>     |         |
|-------------------------------|------------------|---------|-----------------|---------|------------------|---------|--------------------|---------|
|                               | OR (IC95%)       | p-value | OR (IC95%)      | p-value | OR (IC95%)       | p-value | OR (IC95%)         | p-value |
| <b>PANDORA score</b>          | 1.06(0.96-1.16)  | 0.224   | 1.10(0.99-1.23) | 0.080   | 1.09(0.98-1.22)  | 0.119   | 0.97(0.83-1.12)    | 0.667   |
| <b>Age</b>                    | 0.99(0.94-1.05)  | 0.775   | 0.95(0.88-1.03) | 0.219   | 0.95(0.87-1.03)  | 0.206   | 0.98(0.90-1.08)    | 0.754   |
| <b>Sex</b>                    |                  |         |                 |         |                  |         |                    |         |
| Male                          | 1.00             |         |                 |         | 1.00             |         | 1.00               |         |
| Female                        | 4.91(0.51-47.16) | 0.168   |                 |         | 4.78(0.45-51.17) | 0.196   | 28.97(0.98-851.81) | 0.051   |
| <b>BMI (kg/m<sup>2</sup>)</b> | 0.71(0.52-0.98)  | 0.037   |                 |         |                  |         | 0.56(0.31-1.00)    | 0.051   |

204 Logistic regression with Odds Ratio (OR) and 95% confidence interval (95% CI). Models: 1- Age-adjusted; 2 - Adjusted for age and sex; 3-Adjusted for age, sex, and BMI.

## 205 **Discussion**

206

207 PANDORA has been recently developed and validated in a large multinational in-  
208 patient study, which included 2,480 patient care units in 32 countries. Its main advantage  
209 is the simplicity and practicality in the application to predict hospital mortality in 30 days.

210 In addition, it is based on nutritional markers, and may be useful for stratification  
211 of nutritional risk levels [11]. Another advantage found in the present study was the ease  
212 of translation and cross-cultural adaptation, since it is an instrument with direct questions  
213 and easy to understand.

214 The original PANDORA score had a high performance in predicting mortality in  
215 hospitalized patients having three main facilitator points: it is based on data available at  
216 any time of hospitalization; it is not necessary to spend much additional time collecting  
217 data, since the items are part of the patient's history; and the model is public, international  
218 and independent of national codification conventions [2].

219 The association between low weight (BMI <18.5 kg / m<sup>2</sup>) and death in this study  
220 corroborates other studies found in the literature. Hu et al. (2017) evaluated the  
221 relationship between sarcopenic malnutrition syndrome and mortality in hospitalized  
222 elderly. It was observed that individuals with BMI between 18.6 kg / m<sup>2</sup> and 19.5 kg / m<sup>2</sup>  
223 were twice as likely to die compared with individuals whose BMI was greater than 22 kg  
224 / m<sup>2</sup> [12]. Another study with elderly found similar results, and those with a mean BMI  
225 of 21 kg / m<sup>2</sup> had a double risk of mortality [13].

226 A study conducted in the state of São Paulo, Brazil, observed that the presence of  
227 low weight was independently associated with higher mortality rates in patients who  
228 underwent coronary intervention [14]. Other authors performed a prospective nutritional

229 screening and verified a strong association between mortality and risk of malnutrition,  
230 against our findings, in which 100% of the patients who died had nutritional risk [15].

231 In order to analyze the association between BMI and mortality in critically ill  
232 patients, a prospective multicenter study in France found that individuals with BMI <18.5  
233 kg / m<sup>2</sup> had an independent association with higher mortality. The authors also suggested  
234 that BMI may be a useful component in the development of future predictors of mortality.  
235 [16]. Tremblay and Bandi (2003) found similar results, with low weight being associated  
236 with a higher risk of mortality and worsening of functional status, delaying hospital  
237 discharge [17].

238 Hospital malnutrition should be evaluated very carefully since it is a public health  
239 problem, both in underdeveloped and in developing countries. The high prevalence of  
240 this problem persists over the years and presents worrying data [5]. In 1998 a study  
241 promoted by the Brazilian Society of Parenteral and Enteral Nutrition (BRASPEN)  
242 evaluated more than 4,000 hospitalized patients nationwide and found a prevalence of  
243 48.1% of malnutrition [3]. In a recent systematic review, this high prevalence of  
244 malnutrition was confirmed [18]. All these findings reinforce the results found in our  
245 study, showing the importance of nutritional status in the outcome of hospital admissions  
246 [18].

247 Cancer is among the most common non-communicable diseases and injuries that  
248 cause death worldwide [19] and was the most prevalent disease in this study. According  
249 to the National Cancer Institute, the estimated incidence of the disease in 2018 was more  
250 than 300,000 new cases in Brazil [20]. Cancer patients are 1.7 times more likely to present  
251 malnutrition or nutritional risk than other hospitalized patients, both for physiological  
252 effects and for side effects to treatment [21]. A study of more than 2,000 cancer patients

253 found that 19.7% of the individuals presented malnutrition, similar to our findings, where  
254 17.7% of the cancer patients were underweight [22].

255 In this context, malnutrition in individuals with cancer is favored by low food  
256 intake, which was highlighted in this study, since most accepted only 50% of what was  
257 offered on the day. Ferreira, Guimarães and Marcandenti (2013) evaluated the acceptance  
258 of hospital diets of cancer patients admitted to a tertiary hospital and observed a high rate  
259 of rest ingestion among cancer patients and especially among the malnourished ones. The  
260 main associated factors were inappetence, xerostomia, constipation, dysgeusia, nausea  
261 related to smells and early satiety [23].

262 Another study based on Nutrition Day data collected between 2012 and 2015  
263 evaluated the determinants of reduced food intake in colorectal cancer patients and  
264 concluded that being women, with advanced cancer, hospitalization longer than four days,  
265 and weight loss were the main determinants for the reduction of dietary intake of these  
266 patients. That study highlighted the need for the early identification of patients with  
267 nutritional risk for effective therapeutic measures [24].

268 Our study found no positive association between the PANDORA score and death,  
269 which makes it inadequate to predict death in the sample considered. This result can be  
270 justified by the limiting factor of the small sample size. The PANDORA score was  
271 already used in other studies and presented positive results as a tool to predict hospital  
272 death. Nakayama (2018), in an analytical cohort, evaluated whether the PANDORA score  
273 was associated with the mortality of patients in Intensive Care Units (ICU) compared with  
274 APACHE II. The authors concluded that the PANDORA score was strongly associated  
275 with mortality and that it can be compared to APACHE II for predicting mortality in  
276 critically ill patients [11].

277           Therefore, in the present study, the PANDORA score was not able to predict death  
278 in the patients in our sample, but found a significant association of low weight at  
279 admission with mortality.

280

281

## 282 **Conclusions**

283

284           The PANDORA questionnaire was translated and adapted to Portuguese without  
285 any operational difficulties, allowing a final version that is reliable to the original one. It  
286 was not possible to predict death in patients in our sample using the PANDORA score.  
287 However, low weight had significant association with mortality, and may be an  
288 independent factor for predicting death.

289           In addition, a high prevalence of cancer in the studied population and association  
290 of the disease with the occurrence of low weight were observed, which highlights the  
291 need for studies that allow early identification of the nutritional risk factors in these  
292 patients, in order to obtain effective therapeutic plans.

293           Although some studies have shown positive results in relation to the PANDORA  
294 instrument, we suggest further studies for the Portuguese validation of PANDORA in  
295 hospitalized patients.

296

## 297 **References**

298

299 1. Ferreira LS, Marucci MF, Nascimento LF, Lebrão ML, Duarte YA.  
300 Undernutrition as a major risk factor for death among older Brazilian adults in  
301 the community-dwelling setting: SABE survey. **Nutrition**, 2011; 27 (10):  
302 1017- 22.

303

304 2. Hiesmayr M, Franta S, Schindler K, Huber MT, Mouhieddine M, Schuh C, et  
305 al. The Patient- And Nutrition-Derived Outcome Risk Assessment Score  
306 (PANDORA): Development of a Simple Predictive Risk Score for 30-Day In-  
307 Hospital Mortality Based on Demographics, Clinical Observation, and  
308 Nutrition. **PlosOne**, 2015; 10 (5): 1 – 15.

309

310 3. Correia MITD, Waitzber CWT. Inquérito brasileiro de avaliação nutricional  
311 (IBRANUTRI): metodologia do estudo multicêntrico. **Rev Bras Nut Clín**,  
312 1998; 3 (1): 30-40.

313

314 4. Tsaousi GPS, Stavrou GTJ, Panagiotou D, Kotzampassi K. Prognostic indices  
315 of poor nutritional status and their impact on prolonged hospital stay in a  
316 Greek university hospital. **Biomed Res Int**, 2014.

317

318 5. Toledo DO, Piovacari SMF, Matos LBN, Castro MG, Ceniccola GD, Correa  
319 FG, et al. Campanha “Diga não à desnutrição”: 11 passos importantes para  
320 combater a desnutrição hospitalar. **BRASPEN J**, 2018; 33 (1): 86 – 120.

321

322 6. Normand SLT, Mark EG, Sharma RGVRK, Mcneil BJ. Using Admission  
323 Characteristics to Predict Short-term Mortality From Myocardial Infarction in  
324 Elderly Patients. Results From the Cooperative Cardiovascular The Jama  
325 Network. **JAMA** 1996; 275 (17): 1322- 28.

326

327 7. Saposnik G, Kapral MK, Liu Y, Hall RH, O’donnell M, Raptis S, et al. A Risk  
328 Score to Predict Death Early After Hospitalization for an Acute Ischemic  
329 Stroke. **Circulation**; 2010; 123: 739-49.

- 330 8. Beaton DE, Bombardier C, Guillemin F, Ferraz MB. Guidelines for the  
331 Process of Cross-Cultural Adaptation of Self-Report Measures. **Spine**, 2000;  
332 25 (24); 3186- 91.  
333
- 334 9. American Educational Research Association, American Psychological  
335 Association, National Council On Measurement In Education (United States).  
336 **Standards for educational and psychological testing**. AERA, APA, NCME,  
337 2014. 11 p.  
338
- 339 10. Muñiz J, Elosua P, Hambleton RK. Directrices para la traducción y adaptación  
340 de los tests: segunda edición. **Psicothema**, 2013; 25 (2); 151-57.  
341
- 342 11. Nakayama ARD, Canales MPH, Yeah MD, Belcher DMS, Mccarthy CM,  
343 Quraishi SAMD. Patient- and Nutrition-Derived Outcome Risk Assessment  
344 Score as a Predictor of Mortality in Critically Ill Surgical Patients: A  
345 Retrospective, Single-Center Observational Study. **Nutrition in  
346 Clinical Practice**, 2018; 0 (0); 1-6.  
347
- 348 12. Hu X, Zhang L, Wang H, Hao Q, Dong B, Yang M. Malnutrition-sarcopenia  
349 syndrome predicts mortality in hospitalized older patients. **Sci Rep**, 2017; 7  
350 (3171); 1-9.  
351
- 352 13. Söderström L, Rosenblad A, Adolfsson ET, Bergkvist L. Malnutrition is  
353 associated with increased mortality in older adults regardless of the cause of  
354 death. **British J of Nut**, 2017; 117 (532–40).  
355
- 356 14. Lemos PA, Ribeiro EE, Kajita LJ, Filho AE, Campos AH, Falcão BAA, et al.  
357 Muito Baixo Peso Ponderal em Pacientes Tratados com Angioplastia  
358 Coronária: Impacto na Mortalidade Precoce e Tardia. **Rev Bras de Card**,  
359 2008; 16(4); 429-33.  
360
- 361 15. Badosa EL, Tahull MB, Casas NV, Sangrador GE, Méndez CF, Meseguer IH,  
362 et al. Hospital malnutrition screening at admission: malnutrition increases  
363 mortality and length of stay. **Nutrición Hospitalaria**, 2017; 34 (4); 907-13.



- 364 16. Garrouste-Orgeas M, Troch G, Azoulay E, Caubel A, Lассence A, Cheval C,  
365 Montesino L, et al. Body mass index: An additional prognostic factor in ICU  
366 patients. **Int Care Med**, 2004; 30 (1) 437– 43.  
367
- 368 17. Tremblay A, Bandi V. Impact of Body Mass Index on Outcomes Following  
369 Critical Care. **Chest Journal**, 2003; 123 (4); 1202- 07.  
370
- 371 18. Correia MITD, Perman MI, Waitzberg DL. Hospital malnutrition in Latin  
372 America: a systematic review. **Clin Nutr**, 2017; 36 (4); 958-67.  
373
- 374 19. WORLD HEALTH ORGANIZATION. GLOBOCAN 2012: estimated cancer  
375 incidence, mortality and prevalence worldwide in 2012. Lion: **IARC**, 2015.  
376 Disponível em: <https://gco.iarc.fr/today/>.  
377
- 378 20. Instituto Nacional de Câncer José Alencar Gomes da Silva. Coordenação de  
379 prevenção e Vigilância. Estimativa 2018: incidência de câncer no Brasil /  
380 Instituto Nacional de Câncer José Alencar Gomes da Silva. Coordenação de  
381 Prevenção e Vigilância. – Rio de Janeiro: **INCA**, 2017.  
382
- 383 21. Boltong AG, Loeliger JM, Steer BL. Using a public hospital funding model to  
384 strengthen a case for improved nutritional care in a cancer setting. **Australian**  
385 **Health Review**, 2013; 37; 286–90.  
386
- 387 22. Pan H, Cai S, Ji J, Jiang Z, Liang H, Lin F, Liu X. The Impact of Nutritional  
388 Status, Nutritional Risk, and Nutritional Treatment on Clinical Outcome of  
389 2248 Hospitalized Cancer Patients: A Multi-Center, Prospective Cohort Study  
390 in Chinese Teaching Hospitals. **Nutrition and Cancer**, 2013; 65 (1); 62–70.  
391
- 392 23. Ferreira D, Guimarães TG, Marcadentiz A. Aceitação de dietas hospitalares e  
393 estado nutricional entre pacientes com câncer. **Einstein**, 2013; 11 (1); 41-6.  
394
- 395 24. Werf AVD, Arthey K, Hiesmayr M, Sulz I, Schindler K, Laviano A, et al. The  
396 determinants of reduced dietary intake in hospitalised colorectal cancer  
397 patients. **Support Care Cancer**, 2018; 26; 2039–47.

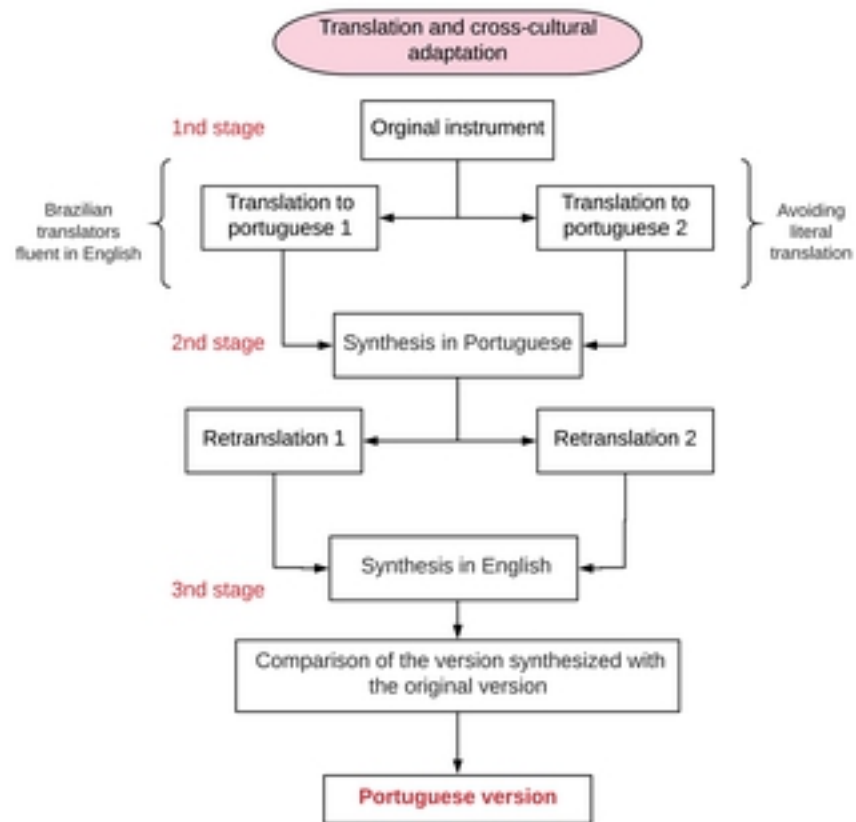

Figure

| <b>Variable</b>                             | <b>Groups</b>           | <b>Score</b> |
|---------------------------------------------|-------------------------|--------------|
| <b>Age</b>                                  | 40                      | 0            |
|                                             | 40-50                   | 6            |
|                                             | 50-60                   | 8            |
|                                             | 60-70                   | 10           |
|                                             | 70-80                   | 11           |
|                                             | 80-90                   | 14           |
|                                             | >=90                    | 17           |
| <b>Body Mass Index (BMI)</b>                | <18.5                   | 9            |
|                                             | 18.5-25                 | 6            |
|                                             | 25-30                   | 2            |
|                                             | 30-35                   | 0            |
|                                             | 35-40                   | 0            |
|                                             | >40                     | 3            |
| <b>Can you walk?</b>                        | Walk without assistance | 0            |
|                                             | Only with assistance    | 6            |
|                                             | I stay in bed           | 11           |
| <b>What did you eat today?</b>              | All                     | 0            |
|                                             | Half                    | 3            |
|                                             | Quarter                 | 9            |
|                                             | Nothing, Allowed        | 12           |
|                                             | Nothing, Not allowed    | 7            |
| <b>Main patient group admitted Internal</b> | Internal                | 7            |
|                                             | Surgery                 | 0            |
|                                             | Geriatrics              | 5            |
|                                             | Neurology               | 3            |
|                                             | Others                  | 6            |
| <b>Diseased Organ</b>                       | Cancer                  | 9            |
| <b>Fluid status</b>                         | Dehydrated              | 7            |
|                                             | Normal                  | 0            |
|                                             | Overload                | 10           |
| <b>PANDORA score</b>                        | <b>Sum</b>              |              |

bioRxiv preprint doi: <https://doi.org/10.1101/584078>; this version posted March 20, 2019. The copyright holder for this preprint (which was not certified by peer review) is the author/funder, who has granted bioRxiv a license to display the preprint in perpetuity. It is made available under aCC-BY 4.0 International license.

Figure 2

| <b>Variável</b>                                  | <b>Grupos</b>            | <b>Escore</b>         |
|--------------------------------------------------|--------------------------|-----------------------|
| <b>Idade</b>                                     | 40                       | 0                     |
|                                                  | 40-50                    | 6                     |
|                                                  | 50-60                    | 8                     |
|                                                  | 60-70                    | 10                    |
|                                                  | 70-80                    | 11                    |
|                                                  | 80-90                    | 14                    |
|                                                  | >=90                     | 17                    |
| <b>Índice de Massa Corporal (IMC)</b>            | <18.5                    | 9                     |
|                                                  | 18.5-25                  | 6                     |
|                                                  | 25-30                    | 2                     |
|                                                  | 30-35                    | 0                     |
|                                                  | 35-40                    | 0                     |
|                                                  | >40                      | 3                     |
|                                                  | <b>É capaz de andar?</b> | A ndo sem assistência |
| A ndo com assistência                            |                          | 6                     |
| Estou acamado                                    |                          | 11                    |
| <b>O que comeu hoje?</b>                         | Tudo                     | 0                     |
|                                                  | Metade                   | 3                     |
|                                                  | Metade da metade         | 9                     |
|                                                  | Nada. Permitido          | 12                    |
|                                                  | Nada. Não permitido      | 7                     |
| <b>Grupo principal de internação do paciente</b> | Clínico                  | 7                     |
|                                                  | Cirurgia                 | 0                     |
|                                                  | Geriatria                | 5                     |
|                                                  | Neurologia               | 3                     |
|                                                  | Outros                   | 6                     |
| <b>Doença</b>                                    | Câncer                   | 9                     |
| <b>Condição de hidratação</b>                    | Desidratado              | 7                     |
|                                                  | Normal                   | 0                     |
|                                                  | Excessivo (edema)        | 10                    |
| <b>Pontuação PANDORA</b>                         | <b>Soma</b>              |                       |

Figure

Sensitivity

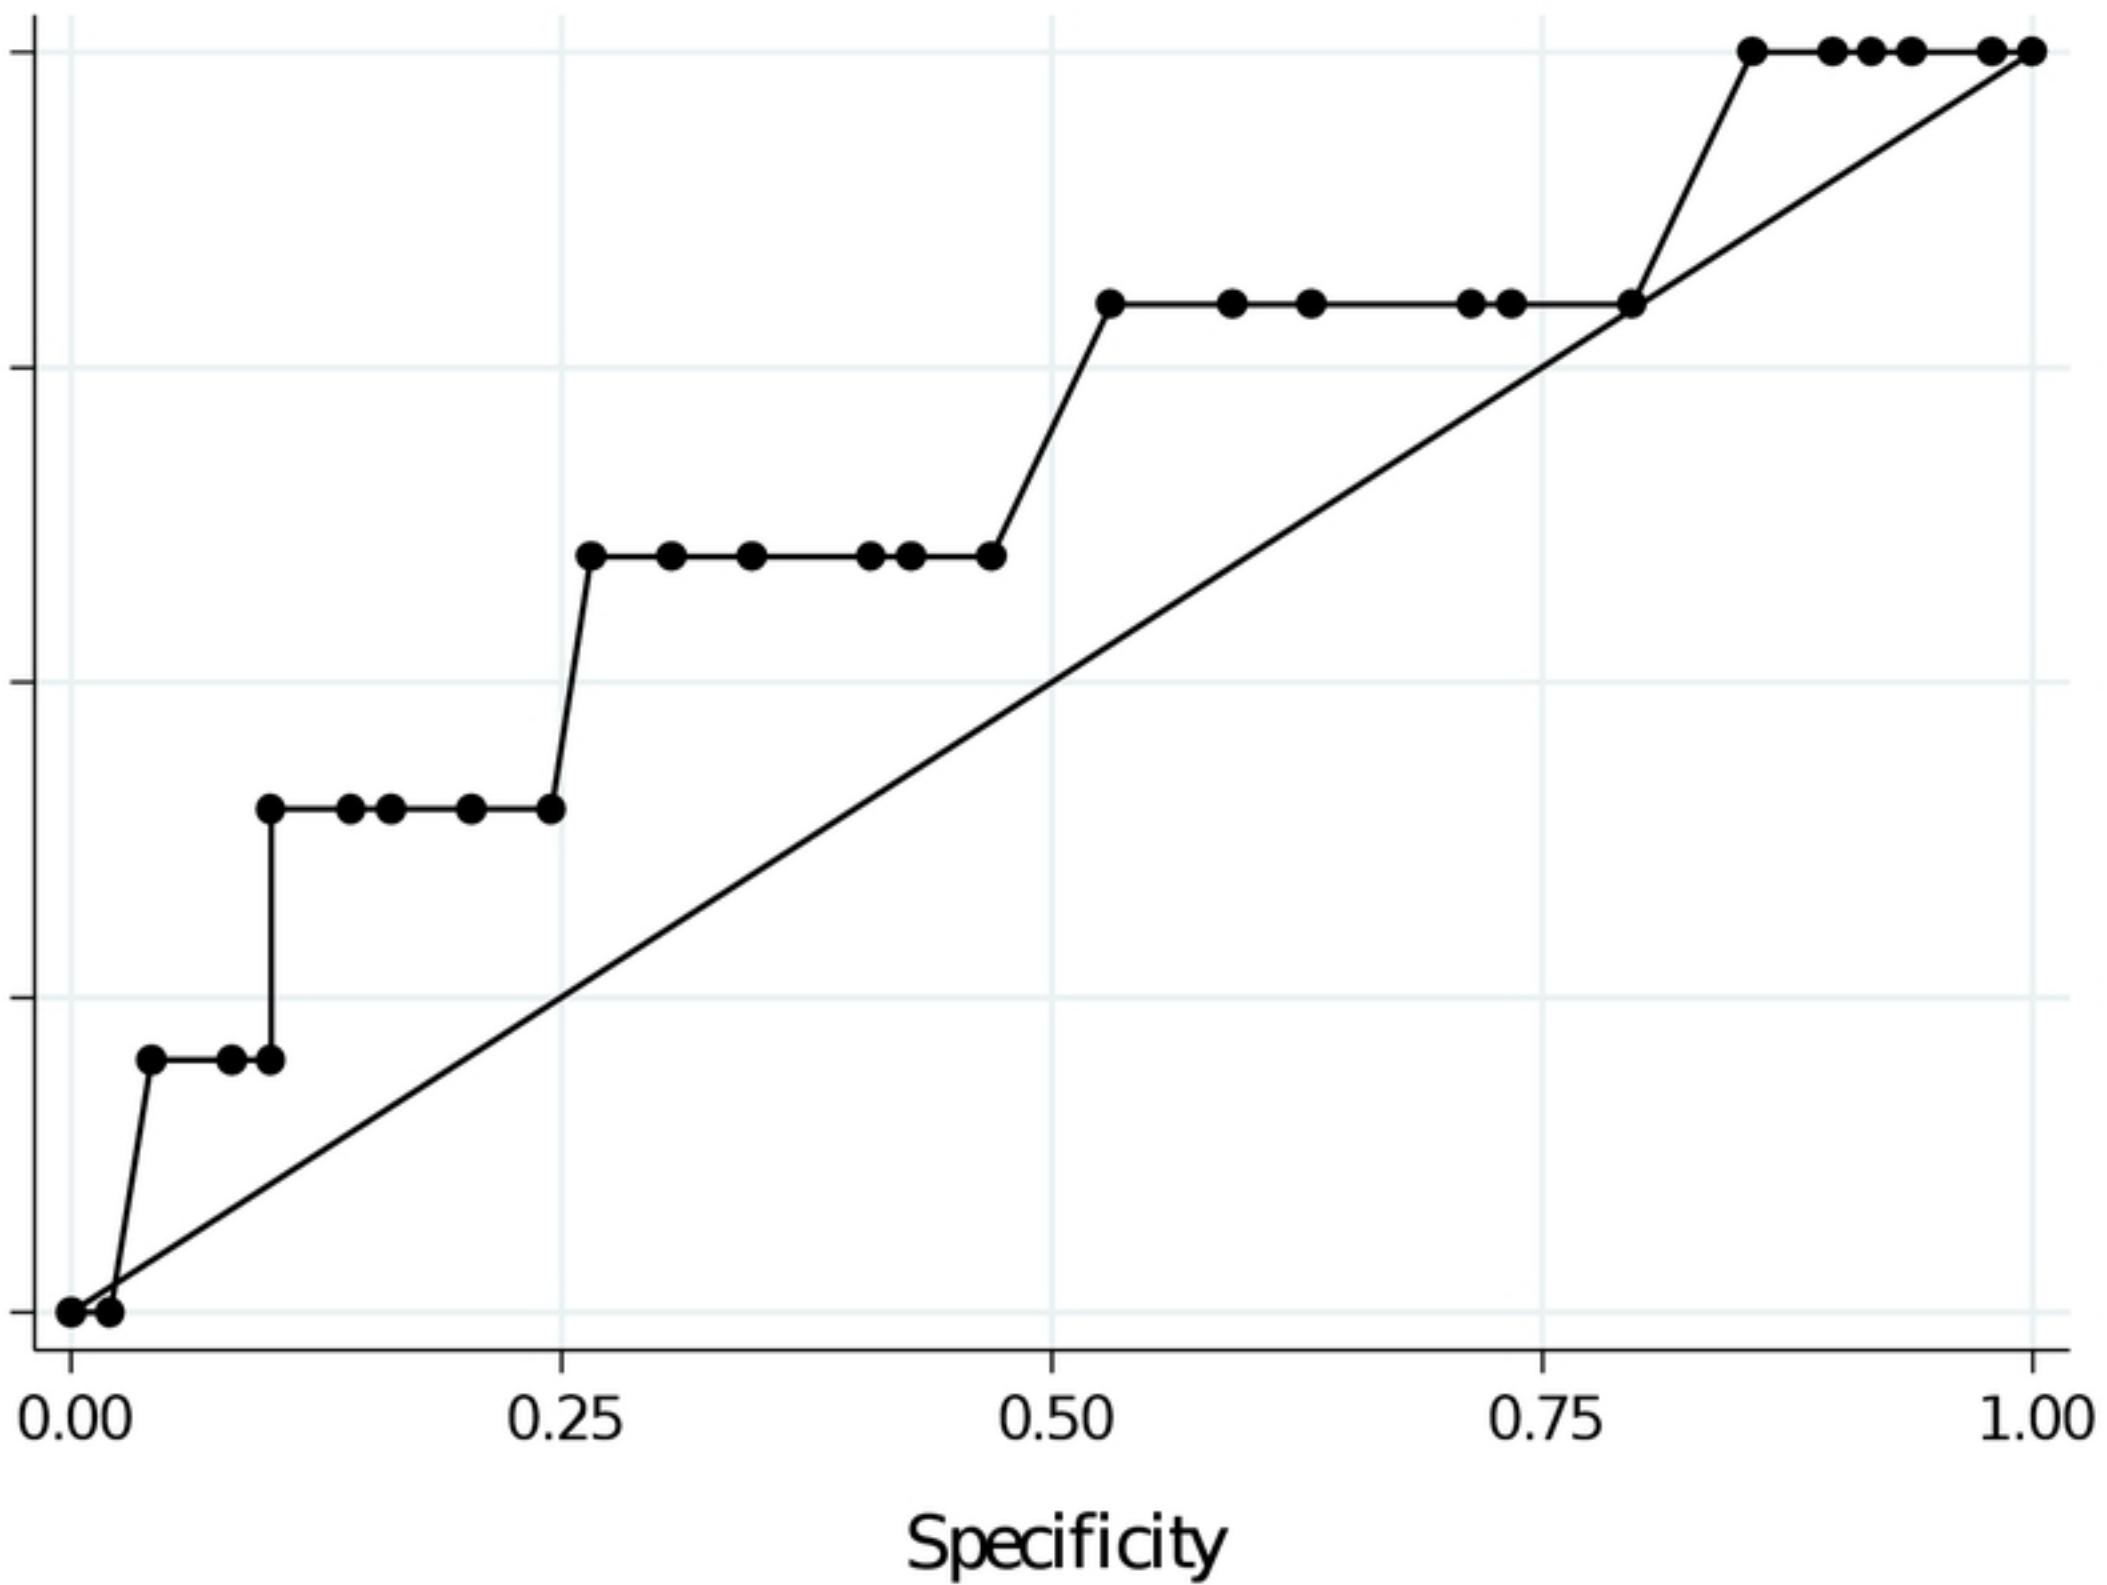

Figure
